# Supplementary material for: Validation of the Student Athletes’ Motivation Toward Sports and Academics Questionnaire (SAMSAQ) for Korean College Student-Athletes: An Application of Exploratory Structural Equation Modeling
Source: PubMed Central journal article supplement (PMC9069065; doi:10.3389/fpsyg.2022.853236), 2022-04-21

## *Supplementary Material*

### Supplementary Figures

**Figure 1.** Hypothetical multiple-indicator multiple-cause approach (MIMIC) model.

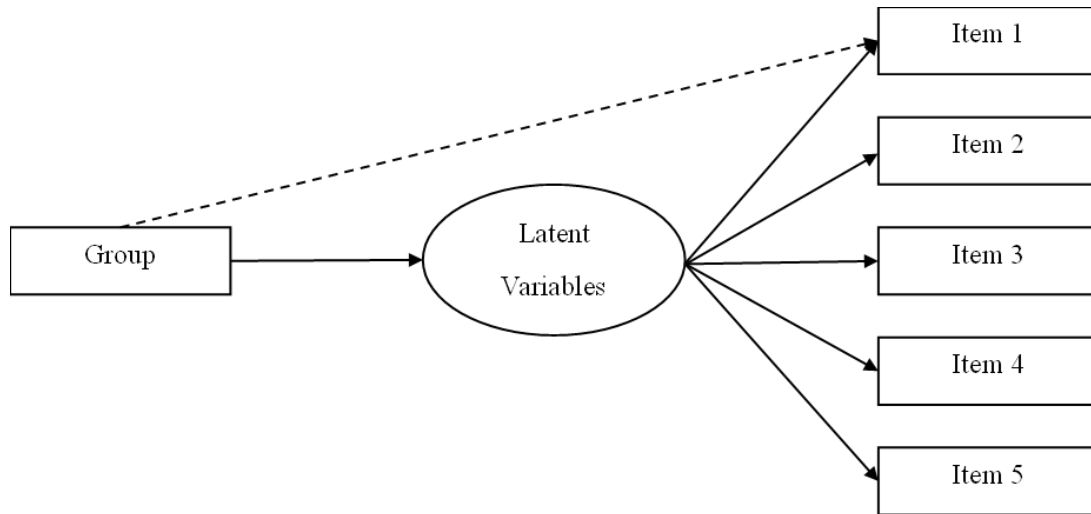

Supplement: Image_1.pdf [file Image_1.pdf]
